# Supplementary material
Source: PubMed Central journal article supplement (PMC10150291)

# Clock like mutational signatures and age in HL

## Introduction: clock like mutational processes and aging

Alexandrov et al. (Nat Gen 2015) demonstrated how SBS1 and SBS5 mutational signatures are acquired at constant rate over time across multiple tumor types. These two clock like mutational processes start to accumulate mutations since the fertilized egg. Based on this assumptions, different groups have investigated the correlation between age and SBS1 and SBS5 using regression models with the intercept restricted to zero (e.g., Gerstung et al Nature 2020; Mitchell et al. Cell 2018).

Here we will investigate the correlation between age and SBS1 and SBS5 in cHL. Only WGS data will be used for this purpose (n=25). Additional WGS from normal Naive B-cells (n=85) and Memory B-cells (n=53) were included as well from Machado et al. Nature 2022.

```
knitr::opts_chunk$set(echo = TRUE)
library(stringr)
library(MASS)
library(lme4)
```

```
## Loading required package: Matrix
```

```
## Warning: package 'Matrix' was built under R version 4.0.5
```

```
library(RColorBrewer)
```

```
## Warning: package 'RColorBrewer' was built under R version 4.0.5
```

## Upload files from HL WGS

```
### file with mutational signature contribution for all cHL included in the study
```

```
comb_all<- read.delim("signatures.counts.txt")
comb_all_wgs<- comb_all[comb_all$seq.x=="wgs",]
head(comb_all_wgs)
```

| ##   | sample      | SBS1   | SBS5   | SBS2    | SBS13   | SBS25  | tot    | Age_Category | Dx.Status |
|------|-------------|--------|--------|---------|---------|--------|--------|--------------|-----------|
| ## 1 | IID_H198425 | 0.2082 | 0.7918 | 0.00000 | 0.00000 | 0      | 2634   | Older Adult  | diagnosis |
| ## 2 | IID_H198426 | 0.1076 | 0.3329 | 0.31220 | 0.24737 | 0      | 1880   | Older Adult  | diagnosis |
| ## 3 | IID_H198427 | 0.1676 | 0.8324 | 0.00000 | 0.00000 | 0      | 3547   | Older Adult  | diagnosis |
| ## 4 | IID_H198428 | 0.1575 | 0.8425 | 0.00000 | 0.00000 | 0      | 2574   | Older Adult  | diagnosis |
| ## 5 | IID_H198429 | 0.1211 | 0.7969 | 0.03859 | 0.04334 | 0      | 4324   | Older Adult  | diagnosis |
| ## 6 | IID_H198430 | 0.1311 | 0.7726 | 0.06359 | 0.03279 | 0      | 5367   | AYA_Peds     | diagnosis |
| ##   | EBV.Status  | age    | seq.x  | col_dg  | seq.y   | Purity | Ploidy | WGD          |           |
| ## 1 | neg         | 58     | wgs    | #82ed82 | wgs     | 0.91   | 2.20   | 0            |           |
| ## 2 | neg         | 55     | wgs    | #82ed82 | wgs     | 0.50   | 3.45   | 1            |           |
| ## 3 | neg         | 76     | wgs    | #82ed82 | wgs     | 0.74   | 2.25   | 0            |           |
| ## 4 | neg         | 69     | wgs    | #82ed82 | wgs     | 0.61   | 2.40   | 0            |           |
| ## 5 | neg         | 66     | wgs    | #82ed82 | wgs     | 0.85   | 3.35   | 1            |           |
| ## 6 | neg         | 26     | wgs    | #82ed82 | wgs     | 0.86   | 2.25   | 0            |           |

Plot SBS signatures contribution across 25 cHL WGS

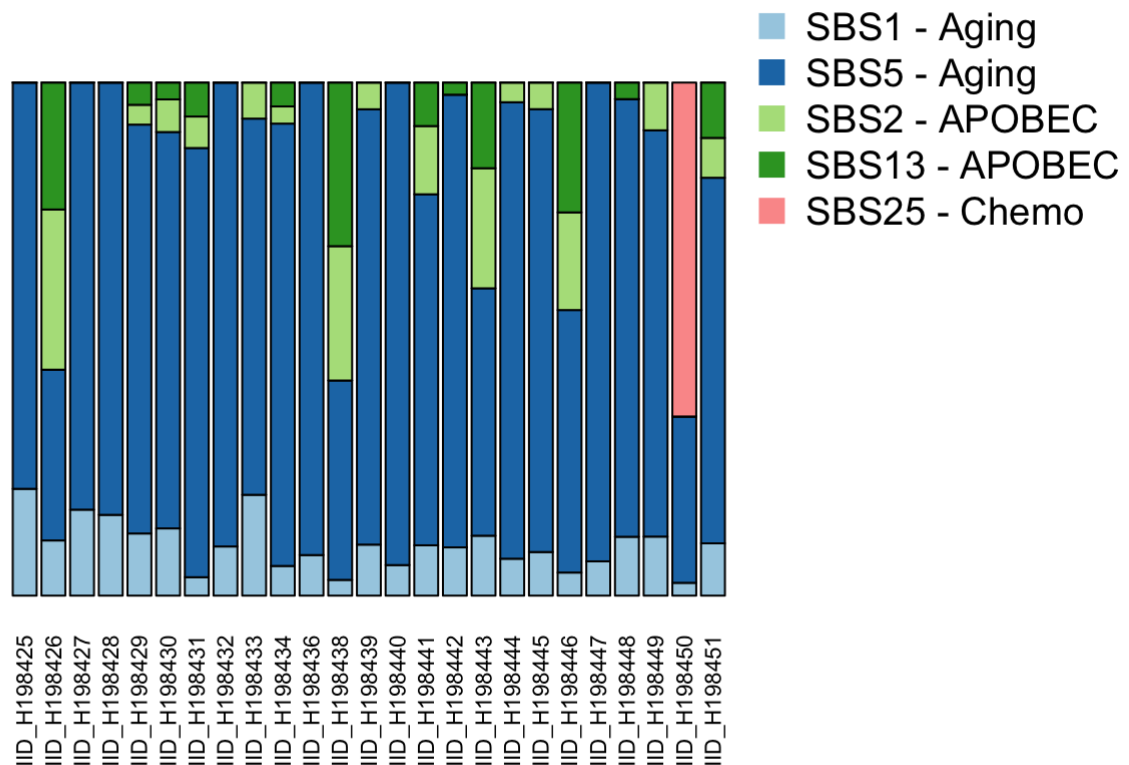

WGS are divided according to EBV status and age

```

comb_all_wgs$SBS1_5_abs<- (comb_all_wgs$SBS1+comb_all_wgs$SBS5)*comb_all_wgs$tot
comb_all_wgs$color<- "cornflowerblue"
comb_all_wgs$color[comb_all_wgs$age<40 & comb_all_wgs$EBV.Status=="neg"]<-"coral2"
comb_all_wgs$color[comb_all_wgs$age>40 & comb_all_wgs$EBV.Status=="neg"]<-"dodgerblue4"
comb_all_wgs$color[comb_all_wgs$age<40 & comb_all_wgs$EBV.Status=="pos"]<-"brown4"
comb_all_wgs$color[comb_all_wgs$age<40 & is.na(comb_all_wgs$EBV.Status)]<-"coral2"

```

## Plot correlation between age and SBS/SBS5 mutational burden

```

par(xpd=F, mar=c(5,5,5,5), mfrow=c(1,1))
plot(comb_all_wgs$age, comb_all_wgs$SBS1_5_abs, pch=21, ylim=c(0,12000), bty="n",
      xlim=c(0,90), bg=comb_all_wgs$color, las=2, yaxt="n", xaxt="n", yla="", xlab="", cex=2)
par(new=T)
plot(comb_all_wgs$age, comb_all_wgs$SBS1_5_abs, pch=21, ylim=c(0,12000), bty="n",
      xlim=c(0,90), bg=comb_all_wgs$color, las=2, yaxt="n", xaxt="n", yla="", xlab="", cex=2)
abline(lm(SBS1_5_abs~0+age, data=comb_all_wgs[comb_all_wgs$Age_Category=="AYA_Peds",])), col="coral2", lty=2, lwd=2)
abline(lm(SBS1_5_abs~0+age, data=comb_all_wgs[comb_all_wgs$Age_Category!="AYA_Peds",])), col="cornflowerblue", lty=2, lwd=2)
axis(side = 1, at=seq(0,90, 20), labels = seq(0,90, 20), las=1, cex.axis=1.5)
axis(side = 2, at=seq(0,12000, 2000), labels = seq(0,12000, 2000), las=1, cex.axis=1.5)

```

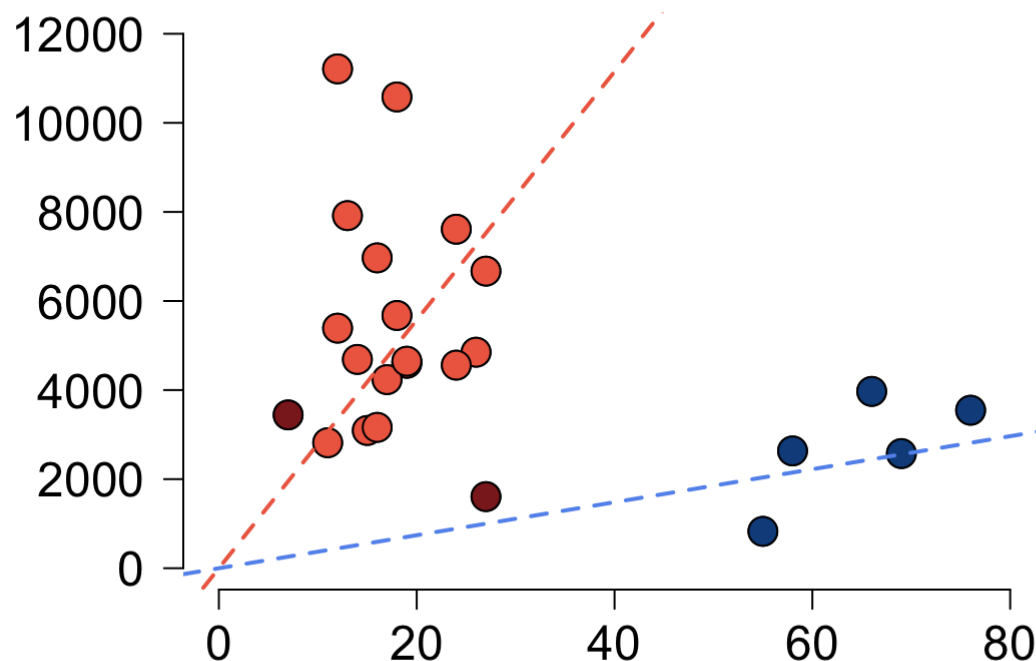

Correlation between age and SBS1/SBS5 mutational burden in Pediatric and young adolescent cHL (Ped/AYA). The intercept was constrained to zero.

```

summary(lm(SBS1_5_abs~0+age, data=comb_all_wgs[comb_all_wgs$Age_Category=="AYA_Peds",]))

```

```
##
## Call:
## lm(formula = SBS1_5_abs ~ 0 + age, data = comb_all_wgs[comb_all_wgs$Age_Category ==
##   "AYA_Peds", ])
##
## Residuals:
##      Min       1Q   Median       3Q      Max
## -5919   -972   -249   1768   7867
##
## Coefficients:
##      Estimate Std. Error t value Pr(>|t|)
## age      278.8      38.8     7.19 0.0000011 ***
## ---
## Signif. codes:  0 '***' 0.001 '**' 0.01 '*' 0.05 '.' 0.1 ' ' 1
##
## Residual standard error: 3130 on 18 degrees of freedom
## Multiple R-squared:  0.742, Adjusted R-squared:  0.727
## F-statistic: 51.7 on 1 and 18 DF, p-value: 0.00000108
```

Correlation between age and SBS1/SBS5 mutational burden in Older Adults cHL (Ped/AYA). The intercept was constrain to zero

```
summary(lm(SBS1_5_abs~0+age , data= comb_all_wgs[comb_all_wgs$Age_Category !="AYA_Peds",]))
```

```
##
## Call:
## lm(formula = SBS1_5_abs ~ 0 + age, data = comb_all_wgs[comb_all_wgs$Age_Category !=
##   "AYA_Peds", ])
##
## Residuals:
##      1       2       3       4       5      24
## 484.7 -1209.9  731.1   17.5 1524.2 -1399.3
##
## Coefficients:
##      Estimate Std. Error t value Pr(>|t|)
## age      37.05      6.76     5.48  0.0028 **
## ---
## Signif. codes:  0 '***' 0.001 '**' 0.01 '*' 0.05 '.' 0.1 ' ' 1
##
## Residual standard error: 1140 on 5 degrees of freedom
## Multiple R-squared:  0.857, Adjusted R-squared:  0.829
## F-statistic: 30 on 1 and 5 DF, p-value: 0.00276
```

Test the same correlation by removing hypermutated samples, similarly to what has been done in other clock-like analyses (e.g. Maura et al. Nat Comm 2020; Gerstung et al. Nature 2020).

```

comb_all_wgs_no_hyper<- comb_all_wgs[comb_all_wgs$tot<10000,]
par(xpd=F, mar=c(5,5,5,5), mfrow=c(1,1))
plot(comb_all_wgs_no_hyper$age, comb_all_wgs_no_hyper$SBS1_5_abs, pch=21, ylim=c(0,12000), bty="n",
      xlim=c(0,90), bg=comb_all_wgs_no_hyper$color, las=2, yaxt="n", xaxt="n", yla="", xlab="", cex=2)
par(new=T)
plot(comb_all_wgs_no_hyper$age, comb_all_wgs_no_hyper$SBS1_5_abs, pch=21, ylim=c(0,12000), bty="n",
      xlim=c(0,90), bg=comb_all_wgs_no_hyper$color, las=2, yaxt="n", xaxt="n", yla="", xlab="", cex=2)
abline(lm(SBS1_5_abs~0+age , data= comb_all_wgs_no_hyper[comb_all_wgs_no_hyper$Age_Category == "AYA_Peds", ])), col="coral2", lty=2, lwd=2)
abline(lm(SBS1_5_abs~0+age , data= comb_all_wgs_no_hyper[comb_all_wgs_no_hyper$Age_Category != "AYA_Peds", ])), col="cornflowerblue", lty=2, lwd=2)
axis(side = 1, at=seq(0,90, 20), labels = seq(0,90, 20), las=1, cex.axis=1.5)
axis(side = 2, at=seq(0,12000, 2000), labels = seq(0,12000, 2000), las=1, cex.axis=1.5)

```

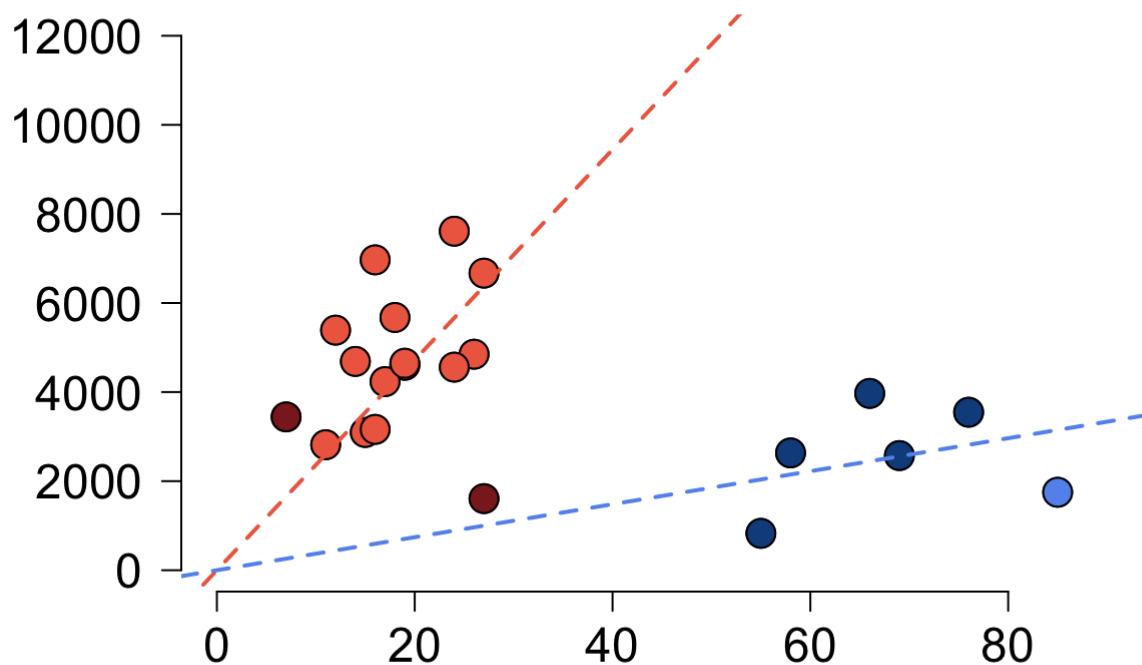

```

summary(lm(SBS1_5_abs~0+age , data= comb_all_wgs_no_hyper[comb_all_wgs_no_hyper$Age_Category != "AYA_Peds", ]))

```

```
##
## Call:
## lm(formula = SBS1_5_abs ~ 0 + age, data = comb_all_wgs_no_hyper[comb_all_wgs_no_hyper
$Age_Category !=
##   "AYA_Peds", ])
##
## Residuals:
##      1      2      3      4      5     24
## 484.7 -1209.9  731.1   17.5 1524.2 -1399.3
##
## Coefficients:
##      Estimate Std. Error t value Pr(>|t|)
## age      37.05      6.76    5.48  0.0028 **
## ---
## Signif. codes:  0 '***' 0.001 '**' 0.01 '*' 0.05 '.' 0.1 ' ' 1
##
## Residual standard error: 1140 on 5 degrees of freedom
## Multiple R-squared:  0.857, Adjusted R-squared:  0.829
## F-statistic:   30 on 1 and 5 DF,  p-value: 0.00276
```

```
summary(lm(SBS1_5_abs~0+age , data= comb_all_wgs_no_hyper[comb_all_wgs_no_hyper$Age_Cate
gory == "AYA_Peds",]))
```

```
##
## Call:
## lm(formula = SBS1_5_abs ~ 0 + age, data = comb_all_wgs_no_hyper[comb_all_wgs_no_hyper
$Age_Category ==
##   "AYA_Peds", ])
##
## Residuals:
##      Min      1Q  Median      3Q      Max
## -4767   -490    220   1516   3191
##
## Coefficients:
##      Estimate Std. Error t value    Pr(>|t|)
## age      236.1      24.8    9.53 0.000000094 ***
## ---
## Signif. codes:  0 '***' 0.001 '**' 0.01 '*' 0.05 '.' 0.1 ' ' 1
##
## Residual standard error: 1900 on 15 degrees of freedom
## Multiple R-squared:  0.858, Adjusted R-squared:  0.849
## F-statistic: 90.8 on 1 and 15 DF,  p-value: 0.0000000942
```

## Upload SBS data from Machado et al. Nature 2022 (SBS data were re-analyzed using mmsig

mmsig code can be found here: <https://github.com/UM-Myeloma-Genomics/mmsig> (<https://github.com/UM-Myeloma-Genomics/mmsig>) Machado et al. Nature 2022 data can be found here: [https://github.com/machadoheather/lymphocyte\\_somatic\\_mutation](https://github.com/machadoheather/lymphocyte_somatic_mutation) ([https://github.com/machadoheather/lymphocyte\\_somatic\\_mutation](https://github.com/machadoheather/lymphocyte_somatic_mutation))

```
machado<- read.delim("machado_mmsig.txt")
head(machado)
```

```
##      sample CellType Cell.type2 Tissue Age Nmut      SBS1      SBS5 SBS8      SBS9 SBS18
## 12 B1_C10  B Naive      Naive B blood  63  998 0.11534 0.8847      0 0.0000      0
## 13 B1_D8   B Naive      Naive B blood  63  838 0.10360 0.8964      0 0.0000      0
## 14 B1_G7   B Memory     Memory B blood  63 1970 0.05884 0.4786      0 0.4626      0
## 15 B10_G7  B Memory     Memory B blood  63 1289 0.08855 0.5926      0 0.3189      0
## 16 B11_A7  B Naive      Naive B blood  63  732 0.14148 0.8585      0 0.0000      0
## 17 B12_B4  B Naive      Naive B blood  63  446 0.13450 0.8655      0 0.0000      0
##      SBS7a SBS17b mutations id
## 12      0      0          997 B1
## 13      0      0          836 B1
## 14      0      0         1960 B1
## 15      0      0         1287 B10
## 16      0      0          730 B11
## 17      0      0          445 B12
```

```
# remove hypermutated cases as done in the original paper
machado<- machado[machado$mutations<2000,]

machado$ageing<- (machado$SBS1+machado$SBS5)*machado$mutations
mycelltypes = c("Naive B", "Memory B")
out<- str_split_fixed(machado$id, "", 8)
machado$sample_ID<- paste0(out[,1],out[,2],out[,3],out[,4],
                           out[,5],out[,6],out[,7])

machado$Num.mutations<- (machado$SBS1+ machado$SBS5)*machado$mutations
machado_naive<- machado[machado$Cell.type2 == "Naive B",]
machado_mem<- machado[machado$Cell.type2 != "Naive B",]
```

Plot correlation between SBS1 and SBS5 mutational burden among naive B-cell using linear mixed effect model.

```
plot( machado_naive$Age, ((machado_naive$SBS1+ machado_naive$SBS5)*machado_naive$mutatio
ns),pch=21, ylim=c(0,2000),bty="n",
      xlim=c(0,90), bg="gold", las=2, yaxt="n", xaxt="n", yla="", xlab="", cex=2, main
="Naive B-cell")
mutns.naive.per.year.lmer <- lmer(Num.mutations ~ Age + (1 + Age | sample_ID ), data=mach
ado_naive, REML=FALSE)
```

```
## boundary (singular) fit: see help('isSingular')
```

```
model_naive<- coef(summary(muts.naive.per.year.lmer))[ , "Estimate"]
abline(a = model_naive[1], b = model_naive[2])
axis(side = 1, at=seq(0,90, 20), labels = seq(0,90, 20), las=1, cex.axis=1.5)
axis(side = 2, at=seq(0,2000, 500), labels = seq(0,2000, 500), las=1, cex.axis=1.5)
```

## Naive B-cell

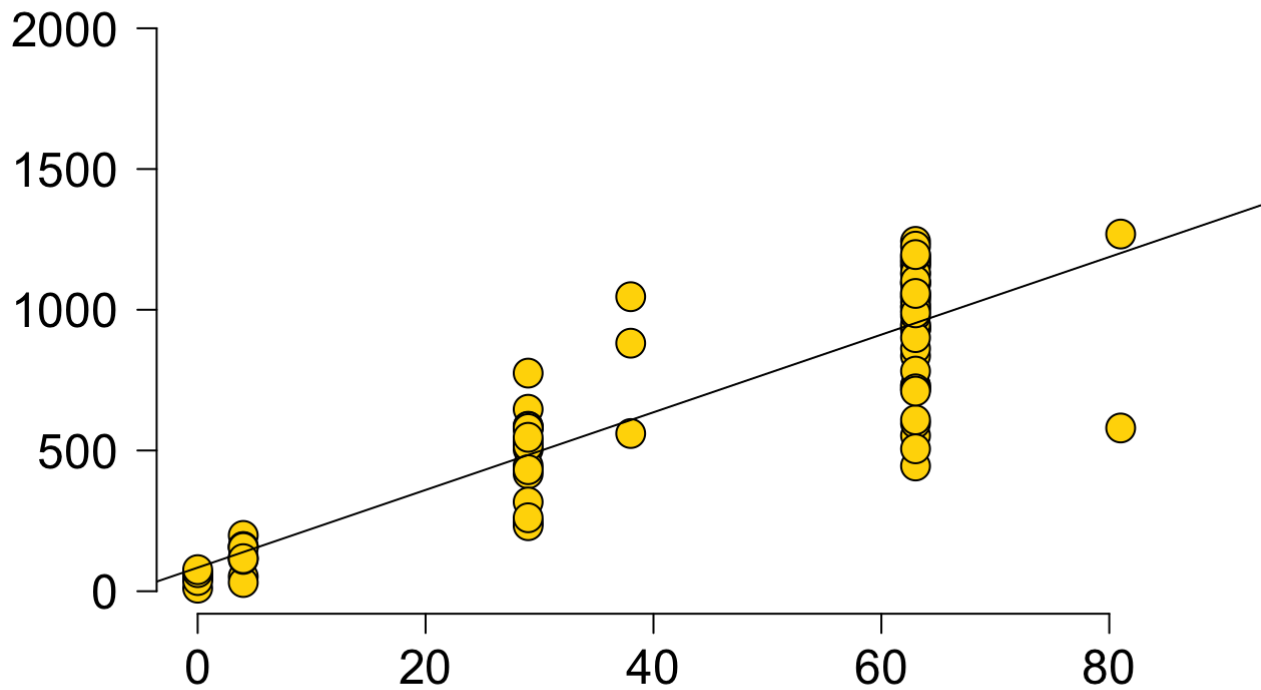

```
summary(muts.naive.per.year.lmer)
```



```
## Linear mixed model fit by maximum likelihood ['lmerMod']
## Formula: Num.mutations ~ Age + (1 + Age | sample_ID)
## Data: machado_naive
##
##      AIC      BIC   logLik deviance df.resid
##  1143.7   1158.4   -565.9   1131.7      79
##
## Scaled residuals:
##   Min      1Q  Median      3Q      Max
## -3.300 -0.356  0.101  0.556  2.327
##
## Random effects:
##   Groups      Name                Variance      Std.Dev.      Corr
##   sample_ID (Intercept)      0.000000000000000  0.00000000
##           Age                0.000000000253    0.0000159   NaN
##   Residual                    35468.033532631984 188.3295875
## Number of obs: 85, groups:  sample_ID, 21
##
## Fixed effects:
##              Estimate Std. Error t value
## (Intercept)   83.862     41.034    2.04
## Age           13.799      0.817   16.89
##
## Correlation of Fixed Effects:
##   (Intr)
## Age -0.867
## optimizer (nloptwrap) convergence code: 0 (OK)
## boundary (singular) fit: see help('isSingular')
```

Plot correlation between SBS1 and SBS5 mutational burden among memory B-cell using linear mixed effect model.

```
plot( machado_mem$Age, ((machado_mem$SBS1+ machado_mem$SBS5)*machado_mem$mutations),pch=
21, ylim=c(0,2000),bty="n",
      xlim=c(0,90), bg="darkgoldenrod3", las=2, yaxt="n", xaxt="n", yla="", xlab="", cex
=2, main="Memory B-cell")
muts.mem.per.year.lmer <- lmer(Num.mutations ~ Age + (1 + Age | sample_ID ), data=machad
o_mem, REML=FALSE)
```

```
## Warning in checkConv(attr(opt, "derivs"), opt$par, ctrl = control$checkConv, :
## Model failed to converge with max|grad| = 0.0072715 (tol = 0.002, component 1)
```

```
model_mem<- coef(summary(muts.mem.per.year.lmer))[ , "Estimate"]
abline(a = model_mem[1], b = model_mem[2])
axis(side = 1, at=seq(0,90, 20), labels = seq(0,90, 20), las=1, cex.axis=1.5)
axis(side = 2, at=seq(0,2000, 500), labels = seq(0,2000, 500), las=1, cex.axis=1.5)
```

### Memory B-cell

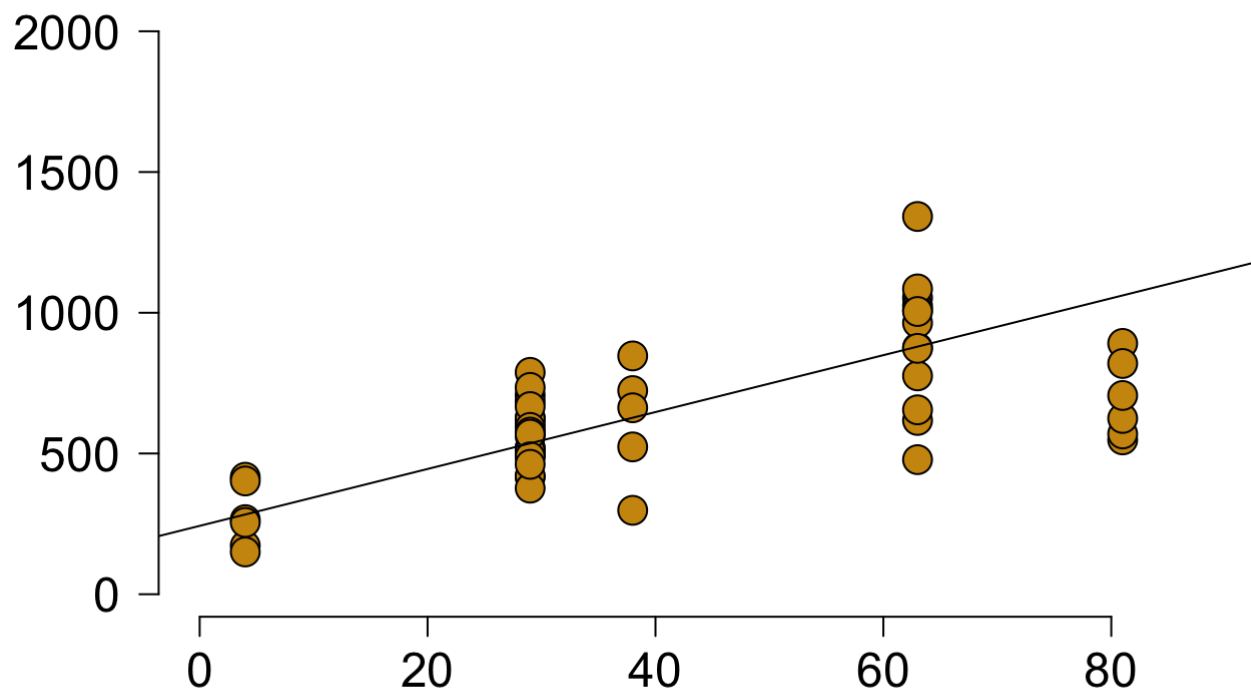

```
summary(muts.mem.per.year.lmer)
```

```

## Linear mixed model fit by maximum likelihood ['lmerMod']
## Formula: Num.mutations ~ Age + (1 + Age | sample_ID)
## Data: machado_mem
##
##      AIC      BIC   logLik deviance df.resid
##  693.6    705.4  -340.8   681.6      47
##
## Scaled residuals:
##      Min       1Q   Median       3Q      Max
## -2.4161 -0.6298 -0.0355  0.5411  2.0157
##
## Random effects:
## Groups      Name      Variance Std.Dev. Corr
## sample_ID (Intercept) 1891.0   43.49
##                Age      13.6    3.69  -1.00
## Residual              15320.8  123.78
## Number of obs: 53, groups: sample_ID, 15
##
## Fixed effects:
##              Estimate Std. Error t value
## (Intercept)   242.91     53.32    4.56
## Age            10.11     1.43    7.06
##
## Correlation of Fixed Effects:
##      (Intr)
## Age -0.777
## optimizer (nloptwrap) convergence code: 0 (OK)
## Model failed to converge with max|grad| = 0.0072715 (tol = 0.002, component 1)

```

Naive and Memory B-cell showed a similar mutation rate per year, but different intercepts. This might be explained by the fact that memory B-cell experience germinal center and poly-eta exposure. This process increases the mutational burden, in particular through a distinct SBS signature: SBS9. SBS9 shared similar trinucleotides with SBS5 and this might create an inter-bleeding of signatures.

Despite these considerations, we re-analyzed the WGS HL data constraining the intercept to the memory and naive B-cell values.

```

### naive B-cell in AYA/Ped
summary(lm(I(SBS1_5_abs - 83) ~ 0 +age, data= comb_all_wgs[comb_all_wgs$Age_Category =
="AYA_Peds", ]))

```

```
##
## Call:
## lm(formula = I(SBS1_5_abs - 83) ~ 0 + age, data = comb_all_wgs[comb_all_wgs$Age_Category ==
##   "AYA_Peds", ])
##
## Residuals:
##   Min       1Q   Median       3Q      Max
## -5886   -966   -285   1725   7835
##
## Coefficients:
##   Estimate Std. Error t value Pr(>|t|)
## age      274.5         38.6    7.11 0.0000012 ***
## ---
## Signif. codes:  0 '***' 0.001 '**' 0.01 '*' 0.05 '.' 0.1 ' ' 1
##
## Residual standard error: 3110 on 18 degrees of freedom
## Multiple R-squared:  0.738, Adjusted R-squared:  0.723
## F-statistic: 50.6 on 1 and 18 DF, p-value: 0.00000125
```

```
### naive B-cell in Older Adults
```

```
summary(lm(I(SBS1_5_abs - 83) ~ 0 +age, data= comb_all_wgs[comb_all_wgs$Age_Category !=
="AYA_Peds",]))
```

```
##
## Call:
## lm(formula = I(SBS1_5_abs - 83) ~ 0 + age, data = comb_all_wgs[comb_all_wgs$Age_Category !=
##   "AYA_Peds", ])
##
## Residuals:
##      1       2       3       4       5      24
## 470.8 -1227.4  738.6   16.7 1519.8 -1381.1
##
## Coefficients:
##   Estimate Std. Error t value Pr(>|t|)
## age      35.86         6.75    5.31  0.0032 **
## ---
## Signif. codes:  0 '***' 0.001 '**' 0.01 '*' 0.05 '.' 0.1 ' ' 1
##
## Residual standard error: 1140 on 5 degrees of freedom
## Multiple R-squared:  0.85, Adjusted R-squared:  0.819
## F-statistic: 28.2 on 1 and 5 DF, p-value: 0.00316
```

```
### Memory B-cell in Ped/AYA
```

```
summary(lm(I(SBS1_5_abs - 243) ~ 0 +age, data= comb_all_wgs[comb_all_wgs$Age_Category =
="AYA_Peds",]))
```

```
##
## Call:
## lm(formula = I(SBS1_5_abs - 243) ~ 0 + age, data = comb_all_wgs[comb_all_wgs$Age_Cate
gory ==
##   "AYA_Peds", ])
##
## Residuals:
##   Min      1Q  Median      3Q      Max
## -5824   -953   -354   1644   7774
##
## Coefficients:
##   Estimate Std. Error t value Pr(>|t|)
## age      266.3      38.2    6.97 0.000017 ***
## ---
## Signif. codes:  0 '***' 0.001 '**' 0.01 '*' 0.05 '.' 0.1 ' ' 1
##
## Residual standard error: 3080 on 18 degrees of freedom
## Multiple R-squared:  0.729, Adjusted R-squared:  0.714
## F-statistic: 48.5 on 1 and 18 DF, p-value: 0.0000166
```

```
### Memory B-cell in Older Adults
summary(lm(I(SBS1_5_abs - 243) ~ 0 +age, data= comb_all_wgs[comb_all_wgs$Age_Category !
="AYA_Peds", ]))
```

```
##
## Call:
## lm(formula = I(SBS1_5_abs - 243) ~ 0 + age, data = comb_all_wgs[comb_all_wgs$Age_Cate
gory !=
##   "AYA_Peds", ])
##
## Residuals:
##      1      2      3      4      5     24
## 444.0 -1261.2  753.1  15.1 1511.3 -1346.0
##
## Coefficients:
##   Estimate Std. Error t value Pr(>|t|)
## age      33.57      6.73    4.99  0.0041 **
## ---
## Signif. codes:  0 '***' 0.001 '**' 0.01 '*' 0.05 '.' 0.1 ' ' 1
##
## Residual standard error: 1140 on 5 degrees of freedom
## Multiple R-squared:  0.833, Adjusted R-squared:  0.799
## F-statistic: 24.9 on 1 and 5 DF, p-value: 0.00414
```

## Linear model vs non-linear model

To better explore the clock-like mutational rate across our cohort we have tested multiple models using the R function `boxcox` to see which one better explains the clock-like mutation distribution.

We observed that the linearity of SBS1-SBS5 in pediatric/AYA can explain the distribution better than other models (see below).

```
### Older Adults
```

```
comb_all_wgs_old<- comb_all_wgs[comb_all_wgs$Age_Category != "AYA_Peds",]  
boxcox(lm(comb_all_wgs_old$SBS1_5_abs~0+comb_all_wgs_old$age))
```

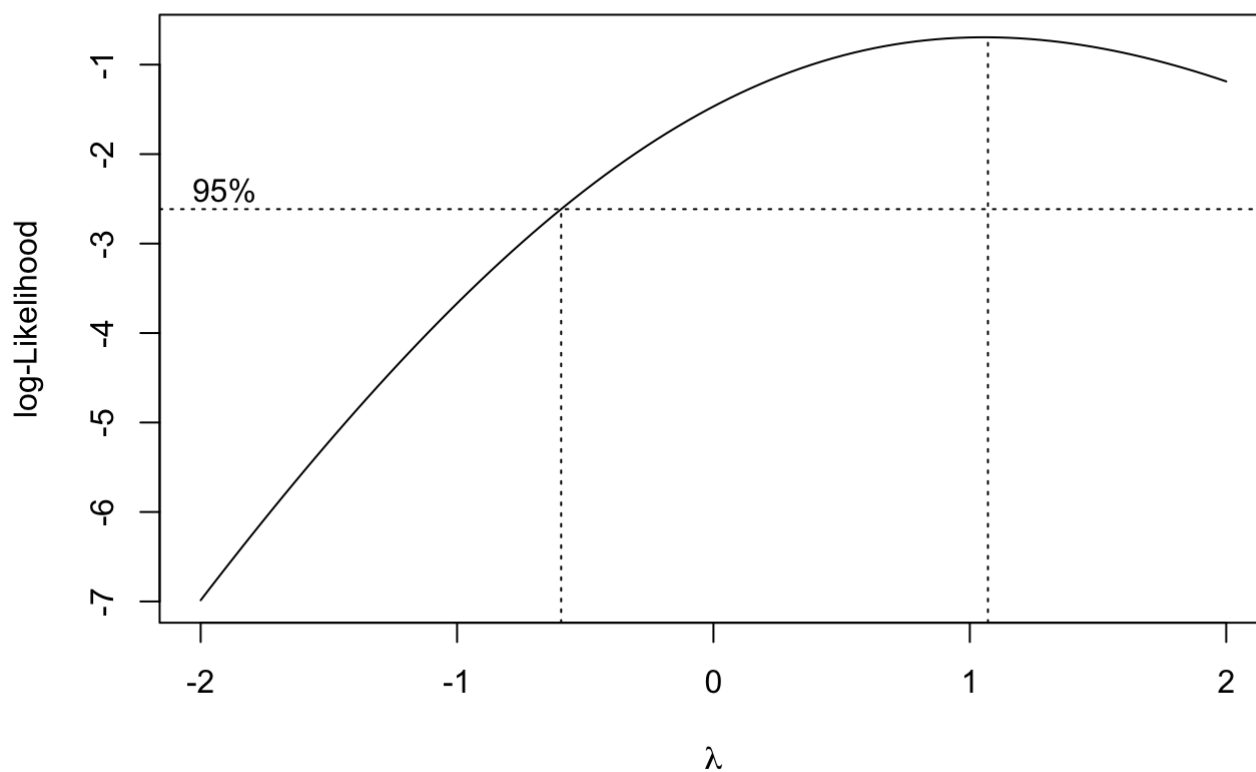

```
### Ped/AYA
```

```
comb_all_wgs_40<- comb_all_wgs[comb_all_wgs$Age_Category == "AYA_Peds",]  
boxcox(lm(comb_all_wgs_40$SBS1_5_abs~0+comb_all_wgs_40$age))
```

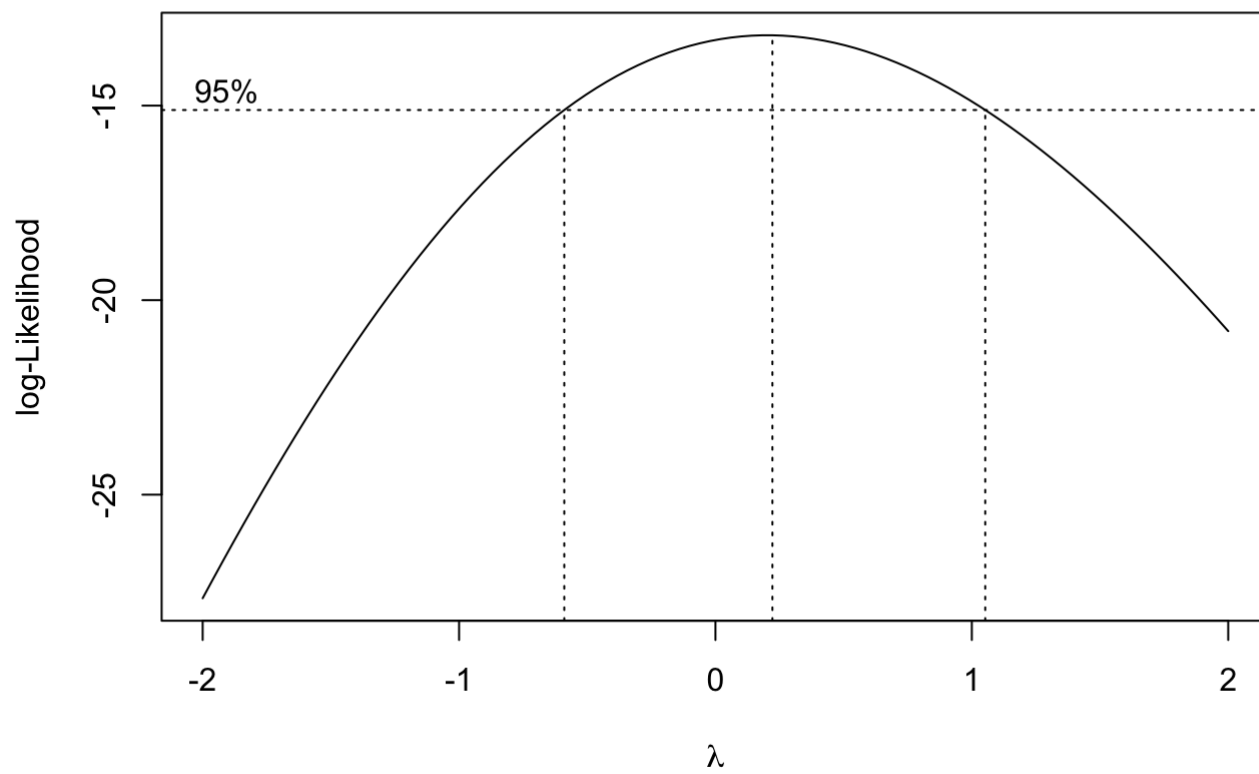

Supplement: bcd-22-0128_supplementary_data_2_suppsm2.pdf [file bcd-22-0128_supplementary_data_2_suppsm2.pdf]
