# Supplementary material
Source: PubMed Central journal article supplement (PMC10150291)
Supplement: bcd-22-0128_supplementary_data_1_suppsm1.pdf [file bcd-22-0128_supplementary_data_1_suppsm1.pdf]

# Driver Analysis

Bachisio Ziccheddu

12/27/2021

```
library(dndscv)
library(stringr)
library(plyr)
library(dplyr)
library(tidyr)
```

## dNdScv

### Input file

```
snv<-read.delim("~/Box/Bachisio/Documents/Project/Team/MauraF/HL/WXS_WGS_dnds_input_file.txt",
               stringsAsFactors = F)
snv1<- snv[,c("sampleID", "chr", "pos", "ref", "alt")]
colnames(snv1)<-c("Tumor_Sample", "Chrom", "Pos", "Ref", "Alt")
```

### dNdScv Algorithm

```
dn<- dndscv(unique(snv1), outmats=T)
#dn$globaldnds
WGS_driver_dnds<- dn$sel_cv
WGS_pos_dnds<- WGS_driver_dnds[WGS_driver_dnds$qglobal_cv<0.1,]
#WGS_pos_dnds$gene_name
```

```
WGS_pos_dnds[1:10,]
```

| ##       | gene_name    | n_syn        | n_mis        | n_non        | n_spl        | n_ind | wmis_cv    | wnon_cv    | wspl_cv    |
|----------|--------------|--------------|--------------|--------------|--------------|-------|------------|------------|------------|
| ## 1822  | B2M          | 0            | 19           | 1            | 2            | 2     | 170.674065 | 293.607742 | 293.607742 |
| ## 8380  | IGLL5        | 11           | 31           | 1            | 0            | 2     | 16.740406  | 6.821669   | 6.821669   |
| ## 7208  | GNA13        | 1            | 11           | 5            | 0            | 5     | 59.471239  | 351.205187 | 351.205187 |
| ## 16421 | SOCS1        | 2            | 20           | 2            | 0            | 40    | 37.686365  | 174.266310 | 174.266310 |
| ## 17946 | TNFAIP3      | 1            | 4            | 3            | 2            | 16    | 8.973277   | 133.843699 | 133.843699 |
| ## 4367  | CSF2RB       | 0            | 1            | 5            | 0            | 3     | 1.705294   | 113.324047 | 113.324047 |
| ## 1947  | BCL7A        | 3            | 13           | 0            | 1            | 1     | 27.349173  | 18.398362  | 18.398362  |
| ## 3831  | CISH         | 0            | 3            | 1            | 1            | 2     | 16.873312  | 193.755381 | 193.755381 |
| ## 8708  | ITPKB        | 5            | 17           | 2            | 0            | 3     | 7.202024   | 14.623059  | 14.623059  |
| ## 16833 | STAT6        | 1            | 17           | 0            | 0            | 0     | 37.616491  | 0.000000   | 0.000000   |
| ##       | wind_cv      | pmis_cv      | ptrunc_cv    | pallsubs_cv  | pind_cv      |       |            |            |            |
| ## 1822  | 709.3870     | 0.000000e+00 | 4.588255e-07 | 0.000000e+00 | 3.671594e-05 |       |            |            |            |
| ## 8380  | 403.9565     | 0.000000e+00 | 1.503414e-01 | 0.000000e+00 | 1.104354e-04 |       |            |            |            |
| ## 7208  | 577.0807     | 7.367800e-09 | 1.197059e-09 | 4.518608e-13 | 4.872712e-08 |       |            |            |            |
| ## 16421 | 8231.5660    | 3.773093e-12 | 1.050684e-04 | 6.713519e-13 | 5.443054e-59 |       |            |            |            |
| ## 17946 | 882.4738     | 1.802083e-02 | 8.989011e-08 | 4.784390e-07 | 1.341162e-16 |       |            |            |            |
| ## 4367  | 144.7809     | 6.239944e-01 | 2.840619e-08 | 1.349829e-07 | 1.749479e-04 |       |            |            |            |
| ## 1947  | 188.0487     | 1.525455e-09 | 5.594304e-02 | 6.556133e-09 | 5.186864e-03 |       |            |            |            |
| ## 3831  | 316.1399     | 2.222685e-03 | 5.207242e-05 | 2.132118e-05 | 1.774664e-04 |       |            |            |            |
| ## 8708  | 138.2069     | 1.553749e-05 | 1.153716e-02 | 1.956747e-05 | 1.977671e-04 |       |            |            |            |
| ## 16833 | 0.0000       | 5.362321e-09 | 7.547564e-01 | 2.257534e-08 | 1.000000e+00 |       |            |            |            |
| ##       | qmis_cv      | qtrunc_cv    | qallsubs_cv  | pglobal_cv   | qglobal_cv   |       |            |            |            |
| ## 1822  | 0.000000e+00 | 1.843653e-03 | 0.000000e+00 | 0.000000e+00 | 0.000000e+00 |       |            |            |            |
| ## 8380  | 0.000000e+00 | 9.759666e-01 | 0.000000e+00 | 0.000000e+00 | 0.000000e+00 |       |            |            |            |
| ## 7208  | 2.114664e-05 | 2.405011e-05 | 3.026112e-09 | 0.000000e+00 | 0.000000e+00 |       |            |            |            |
| ## 16421 | 2.526840e-08 | 2.110930e-01 | 3.372033e-09 | 0.000000e+00 | 0.000000e+00 |       |            |            |            |
| ## 17946 | 7.999232e-01 | 6.019941e-04 | 1.068035e-03 | 0.000000e+00 | 0.000000e+00 |       |            |            |            |
| ## 4367  | 7.999232e-01 | 2.853544e-04 | 3.389927e-04 | 6.014533e-10 | 2.013966e-06 |       |            |            |            |
| ## 1947  | 7.661977e-06 | 9.759666e-01 | 2.634385e-05 | 8.536977e-10 | 2.450234e-06 |       |            |            |            |
| ## 3831  | 7.999232e-01 | 1.494553e-01 | 2.677273e-02 | 7.716113e-08 | 1.759706e-04 |       |            |            |            |
| ## 8708  | 2.601365e-02 | 9.759666e-01 | 2.677273e-02 | 7.882812e-08 | 1.759706e-04 |       |            |            |            |
| ## 16833 | 2.114664e-05 | 9.759666e-01 | 7.559352e-05 | 4.200460e-07 | 8.439144e-04 |       |            |            |            |

# Restricted hypothesis

```

cosmic<- read.delim("~/Box/Bachisio/Desktop/Tools/Reference/UCSC/COSMIC_census.csv", sep
=",")

Rossi<- c("STAT6", "ITPKB", "TNFAIP3", "B2M", "GNA13", "HIST1H1E", "CIITA", "IRF8", "ARID1A",
         "BTG1", "IRF4", "PCBP1", "PIM1", "STAT3", "ATM", "BCL6", "BTK", "CCND3", "CD58", "CXCR
4",
         "ID3", "KMT2D", "MYC", "NFKBIE", "NOTCH1", "PRDM1", "SPEN", "TET2", "TNFRSF14", "TP
53", "TRAF3", "XPO1")

Shipp<- c("SOCS1", "IKBKB", "GNA13", "ARID1A", "DNAH12", "NFKBIA", "ACTB", "HLA-B", "STAT6", "RBM
38",
         "XPO1", "CSF2RB", "TNFAIP3", "NFKBIE", "B2M", "HLA-B")

HL_drivers<- unique(c(cosmic$Gene.Symbol, Shipp, Rossi))
HL_drivers<- HL_drivers[!(HL_drivers %in% c("IGH", "IGK", "IGL", "TRA", "TRB", "TRD", "ZNF19
8", "ZNF278", "AFDN", "DUX4L1", "HMGN2P46", "KNL1", "LHFPL6", "MALAT1",
         "MRTFA", "NSD2", "NSD3", "SHTN1", "TENT5C", "WDC
P"))]
final_dnds<-snv1
dn_dri <- dndscv(unique(final_dnds), outmats=T, gene_list = HL_drivers)
#dn_dri$globaldnds
dn_dris_sel<- dn_dri$sel_cv
#dn_dris_sel[dn_dris_sel$qallsubs_cv<0.1,]

####estimate # drivers per sample - all nonsynonymous - not sig

dndsoutccfNE<- dn_dri
wmis = dndsoutccfNE$globaldnds["wall", "mle"]
wmis_low = dndsoutccfNE$globaldnds["wall", "cilow"]
wmis_high = dndsoutccfNE$globaldnds["wall", "cihigh"]
num_mis = nrow(unique(dndsoutccfNE$annotmuts[dndsoutccfNE$annotmuts$impact!="Synonymou
s", ]))
num_missense_drivers = ((wmis-1)/wmis) * num_mis
num_missense_drivers_lowci = ((wmis_low-1) /wmis) * num_mis
num_missense_drivers_hici = ((wmis_high-1)/wmis) * num_mis
num_missense_drivers/nrow(as.data.frame(unique(final_dnds$Tumor_Sample)))

```

```
## [1] 1.764339
```

```
num_missense_drivers_hici/nrow(as.data.frame(unique(final_dnds$Tumor_Sample)))
```

```
## [1] 4.033966
```

```
num_missense_drivers_lowci/nrow(as.data.frame(unique(final_dnds$Tumor_Sample)))
```

```
## [1] -0.1331823
```

```
####estimate # drivers per sample - all missense - not sig
wmis = dndsoutccfNE$globaldnds["wmis","mle"]
wmis_low = dndsoutccfNE$globaldnds["wmis","cilow"]
wmis_high = dndsoutccfNE$globaldnds["wmis","cihigh"]
num_mis = nrow(unique(dndsoutccfNE$annotmutts[dndsoutccfNE$annotmutts$impact=="Missense",]))
num_missense_drivers = ((wmis-1)/wmis) * num_mis
num_missense_drivers_lowci = ((wmis_low-1) /wmis) * num_mis
num_missense_drivers_hici = ((wmis_high-1)/wmis) * num_mis
num_missense_drivers/nrow(as.data.frame(unique(final_dnds$Tumor_Sample)))
```

```
## [1] 0.8974077
```

```
num_missense_drivers_hici/nrow(as.data.frame(unique(final_dnds$Tumor_Sample)))
```

```
## [1] 2.554394
```

```
num_missense_drivers_lowci/nrow(as.data.frame(unique(final_dnds$Tumor_Sample)))
```

```
## [1] -0.4832407
```

```
####estimate # drivers per sample - all trunc - not sig
wmis = dndsoutccfNE$globaldnds["wtru","mle"]
wmis_low = dndsoutccfNE$globaldnds["wtru","cilow"]
wmis_high = dndsoutccfNE$globaldnds["wtru","cihigh"]
num_mis = nrow(unique(dndsoutccfNE$annotmutts[dndsoutccfNE$annotmutts$impact!="Missense" &
dndsoutccfNE$annotmutts$impact!="Synonymous",]))
num_missense_drivers = ((wmis-1)/wmis) * num_mis
num_missense_drivers_lowci = ((wmis_low-1) /wmis) * num_mis
num_missense_drivers_hici = ((wmis_high-1)/wmis) * num_mis
num_missense_drivers/nrow(as.data.frame(unique(final_dnds$Tumor_Sample)))
```

```
## [1] 1.330967
```

```
num_missense_drivers_hici/nrow(as.data.frame(unique(final_dnds$Tumor_Sample)))
```

```
## [1] 2.450127
```

```
num_missense_drivers_lowci/nrow(as.data.frame(unique(final_dnds$Tumor_Sample)))
```

```
## [1] 0.4955527
```

```

# plot
# Function to calculate confidence intervals for dN/dS values per gene under the dNdScv
model using profile likelihood.

dn_dri_driver_dnds<- geneci(dn_dri, gene_list = HL_drivers, level = 0.95)
#dn_dri_driver_dnds[dn_dri_driver_dnds$mis_low>1 | dn_dri_driver_dnds$tru_low>1,]

data("knownhotspots_hg19", package="dndscv") # Previously known hotspots
known_hotspots = known_hotspots[sapply(known_hotspots, function(x) strsplit(x, split
=":")[[1]][5]) %in% HL_drivers] # Known hotspots in targetgenes
hotspots_siteRHT_81_sd = sitednds(dn_dri, site_list = known_hotspots, min_recurr = 1, me
thod = "LNP")
hotspot_HL<- hotspots_siteRHT_81_sd$recursites
#length(unique(final_dnds$Tumor_Sample))
#hotspot_HL

all_driver_HL<- unique(c(dn_dri_driver_dnds[dn_dri_driver_dnds$mis_low>1 | dn_dri_driver
_dnds$tru_low>1,]$gene,
                        dn_dris_sel[dn_dris_sel$qallsubs_cv<0.1,]$gene_name, WGS_pos_dn
ds$gene_name, hotspot_HL$gene))

all_driver_HL<- unique(c(dn_dris_sel[dn_dris_sel$qallsubs_cv<0.1,]$gene_name, WGS_pos_dn
ds$gene_name, hotspot_HL$gene))
all_driver_HL<- all_driver_HL[all_driver_HL!="FANCF"]

Shipp_u<- Shipp[!Shipp %in% all_driver_HL]
missed<- WGS_driver_dnds[WGS_driver_dnds$gene_name %in% Shipp_u,]

#hotspot_HL[order(hotspot_HL$gene),]

print(missed)

```

| ##       | gene_name | n_syn       | n_mis        | n_non       | n_spl       | n_ind     | wmis_cv  | wnon_cv  | wspl_cv  |
|----------|-----------|-------------|--------------|-------------|-------------|-----------|----------|----------|----------|
| ## 11342 | NFKBIA    | 1           | 0            | 0           | 2           | 1         | 0.000000 | 52.13431 | 52.13431 |
| ## 7949  | HLA-B     | 2           | 0            | 2           | 0           | 1         | 0.000000 | 40.30555 | 40.30555 |
| ## 513   | ACTB      | 2           | 8            | 0           | 0           | 1         | 8.013095 | 0.00000  | 0.00000  |
| ## 1465  | ARID1A    | 0           | 2            | 0           | 0           | 3         | 1.824467 | 0.00000  | 0.00000  |
| ## 8398  | IKBKB     | 0           | 2            | 0           | 0           | 0         | 5.671292 | 0.00000  | 0.00000  |
| ## 5159  | DNAH12    | 0           | 0            | 0           | 0           | 0         | 0.000000 | 0.00000  | 0.00000  |
| ## 14291 | RBM38     | 0           | 0            | 0           | 0           | 0         | 0.000000 | 0.00000  | 0.00000  |
| ##       | wind_cv   | pmis_cv     | ptrunc_cv    | pallsubs_cv | pind_cv     | qmis_cv   |          |          |          |
| ## 11342 | 137.19277 | 0.384900269 | 0.001749545  | 0.003105435 | 0.007045850 | 0.7999232 |          |          |          |
| ## 7949  | 120.18540 | 0.300512584 | 0.002237911  | 0.003141243 | 0.008005486 | 0.7999232 |          |          |          |
| ## 513   | 116.03005 | 0.002942151 | 0.749588790  | 0.010064717 | 0.008281072 | 0.7999232 |          |          |          |
| ## 1465  | 57.25367  | 0.439505772 | 0.688624949  | 0.684494150 | 0.001732905 | 0.7999232 |          |          |          |
| ## 8398  | 0.00000   | 0.062417928 | 0.752188333  | 0.164690899 | 1.000000000 | 0.7999232 |          |          |          |
| ## 5159  | 0.00000   | 0.103075403 | 0.568754469  | 0.225139118 | 1.000000000 | 0.7999232 |          |          |          |
| ## 14291 | 0.00000   | 0.483666056 | 0.865295645  | 0.771297351 | 1.000000000 | 0.7999232 |          |          |          |
| ##       | qtrunc_cv | qallsubs_cv | pglobal_cv   | qglobal_cv  |             |           |          |          |          |
| ## 11342 | 0.9759666 | 0.9979919   | 0.0002566557 | 0.1983257   |             |           |          |          |          |
| ## 7949  | 0.9759666 | 0.9979919   | 0.0002914751 | 0.2168898   |             |           |          |          |          |
| ## 513   | 0.9759666 | 0.9979919   | 0.0008661802 | 0.5438258   |             |           |          |          |          |
| ## 1465  | 0.9759666 | 0.9979919   | 0.0091773844 | 1.0000000   |             |           |          |          |          |
| ## 8398  | 0.9759666 | 0.9979919   | 0.4617413861 | 1.0000000   |             |           |          |          |          |
| ## 5159  | 0.9759666 | 0.9979919   | 0.5608298204 | 1.0000000   |             |           |          |          |          |
| ## 14291 | 0.9759666 | 0.9979919   | 0.9715888579 | 1.0000000   |             |           |          |          |          |

all\_driver\_HL

|         |          |            |          |           |          |           |
|---------|----------|------------|----------|-----------|----------|-----------|
| ## [1]  | "SOCS1"  | "B2M"      | "GNA13"  | "TNFAIP3" | "CSF2RB" | "STAT6"   |
| ## [7]  | "NONO"   | "IGLL5"    | "BCL7A"  | "CISH"    | "ITPKB"  | "FAM230A" |
| ## [13] | "MSL2"   | "HIST1H1E" | "NFKBIE" | "PTPN1"   | "SPDYE1" | "P2RY8"   |
| ## [19] | "TMSB4X" | "MAL2"     | "RAB19"  | "MFHAS1"  | "XPO1"   | "TP53"    |
| ## [25] | "EZH2"   | "CCND3"    |          |           |          |           |

hotspot\_HL

| ##    | chr | pos          | ref | mut        | gene  | aachange     | impact   | ref3_cod     | mut3_cod | freq |
|-------|-----|--------------|-----|------------|-------|--------------|----------|--------------|----------|------|
| ## 1  | 2   | 61719472     | C   | T          | XP01  | E571K        | Missense | CGA          | CAA      | 5    |
| ## 2  | 15  | 45003779     | T   | C          | B2M   | L12P         | Missense | CTA          | CCA      | 3    |
| ## 3  | 15  | 45003745     | A   | T          | B2M   | M1L          | Missense | GAT          | GTT      | 2    |
| ## 4  | 15  | 45003746     | T   | A          | B2M   | M1K          | Missense | ATG          | AAG      | 2    |
| ## 5  | 17  | 7577094      | G   | A          | TP53  | R282W        | Missense | CCG          | CTG      | 2    |
| ## 6  | 7   | 148508727    | T   | A          | EZH2  | Y646F        | Missense | TAC          | TTC      | 1    |
| ## 7  | 6   | 41903688     | A   | T          | CCND3 | I290K        | Missense | ATA          | AAA      | 1    |
| ## 8  | 17  | 7578235      | T   | A          | TP53  | Y205F        | Missense | TAT          | TTT      | 1    |
| ## 9  | 17  | 7578406      | C   | T          | TP53  | R175H        | Missense | CGC          | CAC      | 1    |
| ## 10 | 17  | 7577538      | C   | T          | TP53  | R248Q        | Missense | CGG          | CAG      | 1    |
| ##    |     | mu           |     | dnds       |       | pval         |          | qval         |          |      |
| ## 1  |     | 8.813401e-04 |     | 5673.1791  |       | 9.536185e-15 |          | 1.089032e-11 |          |      |
| ## 2  |     | 1.438717e-03 |     | 2085.1915  |       | 4.958491e-09 |          | 2.831299e-06 |          |      |
| ## 3  |     | 4.293850e-04 |     | 4657.8247  |       | 1.989939e-07 |          | 7.575034e-05 |          |      |
| ## 4  |     | 1.031902e-03 |     | 1938.1694  |       | 1.147125e-06 |          | 3.275041e-04 |          |      |
| ## 5  |     | 2.420248e-03 |     | 826.3617   |       | 6.283328e-06 |          | 1.435112e-03 |          |      |
| ## 6  |     | 3.001536e-05 |     | 33316.2707 |       | 3.001421e-05 |          | 5.712704e-03 |          |      |
| ## 7  |     | 1.284294e-04 |     | 7786.3769  |       | 1.284108e-04 |          | 1.917261e-02 |          |      |
| ## 8  |     | 1.343293e-04 |     | 7444.3924  |       | 1.343090e-04 |          | 1.917261e-02 |          |      |
| ## 9  |     | 1.593795e-03 |     | 627.4332   |       | 1.591047e-03 |          | 2.018862e-01 |          |      |
| ## 10 |     | 2.207542e-03 |     | 452.9925   |       | 2.202281e-03 |          | 2.515005e-01 |          |      |

## MutSigCV

# Input file

```

annotated<-read.delim("~/Box/Bachisio/Documents/Project/Team/MauraF/HL/WXS_WGS_dnds_inpu
t_annot.hg19_multianno.txt",
                    stringsAsFactors = F)
annotated$ExonicFunc.refGene<-ifelse(annotated$ExonicFunc.refGene=="", "Intron", annotat
e$ExonicFunc.refGene)
annotated.1<-separate(annotated,col = "Gene.refGene",into=c("Hugo_Symbol","rem"),sep
=";")
#head(annotated.1)
annotated<-annotated.1

annotated.1<-annotated[,c("Hugo_Symbol","Otherinfo10","Chr","Start","End","Ref","Alt","E
xonicFunc.refGene")]
colnames(annotated.1)<-c("Hugo_Symbol","Tumor_Sample_Barcode","Chromosome","Start_positi
on","End_position",
                        "Reference_Allele","Tumor_Seq_Allele2","Variant_Classificatio
n")
annotated.1$gene<-annotated.1$Hugo_Symbol
annotated.1$patient<-annotated.1$Tumor_Sample_Barcode
annotated.1$effect<-ifelse(annotated.1$Variant_Classification=="synonymous SNV","silen
t",NA)
annotated.1$effect<-ifelse(annotated.1$Variant_Classification%in%c("frameshift deletio
n","frameshift insertion","frameshift substitution",
                                                                    "nonframeshift deleti
on","nonframeshift insertion",
                                                                    "nonframeshift substi
tution","stopgain","stoploss"),"null",
                          annotated.1$effect)
annotated.1$effect<-ifelse(annotated.1$Variant_Classification=="nonsynonymous SNV","nons
ilent",annotated.1$effect)
annotated.1$effect<-ifelse(annotated.1$Variant_Classification=="Intron","noncoding",anno
tated.1$effect)
annotated.1$effect<-ifelse(annotated.1$Variant_Classification=="unknown",NA,annotated.1
$effect)
annotated.1$chr<-annotated.1$Chromosome
annotated.1$start<-annotated.1$Start_position
annotated.1$ref_allele<-annotated.1$Reference_Allele

annotated.2<-annotated.1[!is.na(annotated.1$effect),]

write.table(annotated.2,
            "~/Box/Bachisio/Documents/Project/Team/MauraF/HL/WXS_WGS_inputMutSigCV.maf",
            col.names = T,
            row.names = F,
            quote = F,
            sep="\t")

```



## MutSigCV Algorithm

```
~/Desktop/Tools/MutSigCV/MutSigCV_1.41/run_MutSigCV.sh ~/Desktop/Tools/MutSigCV/mcr-8.3-0/share/mcr-8.3-0/v83 \  
~/Documents/Project/HL/WXS_WGS_inputMutSigCV.maf \  
~/Desktop/Tools/MutSigCV/exome_full192.coverage.txt \  
~/Desktop/Tools/MutSigCV/gene.covariates.txt \  
~/Documents/Project/HL/Driver_Analysis/MutSigCV_output \  
~/Desktop/Tools/MutSigCV/mutation_type_dictionary_file.txt \  
~/Desktop/Tools/MutSigCV/chr_files_hg19
```

## OncodriverFML

### Input file

```
snv2<- snv[,c("chr", "pos", "ref", "alt", "sampleID")]  
colnames(snv2)<-c("CHROMOSOME", "POSITION", "REF", "ALT", "SAMPLE")  
  
write.table(snv2,  
            "~/Box/Bachisio/Documents/Project/Team/MauraF/HL/WXS_WGS_oncodriverFML.txt",  
            col.names = T,  
            row.names = F,  
            quote = F,  
            sep="\t")
```

### OncodriverFML algorithm

```
oncodrivefml \  
--input ~/Documents/Project/HL/WXS_WGS_oncodriverFML.txt \  
--elements ~/Desktop/Tools/oncodrivefml/example/cds.tsv.gz \  
--sequencing wgs \  
--output ~/Documents/Project/HL/Driver_Analysis/oncodriveFML_output
```
